# Supplementary material for: DNA supercoiling differences in bacteria result from disparate DNA gyrase activation by polyamines
Source: PubMed Central journal article supplement (PMC7598504; doi:10.1371/journal.pgen.1009085), 2020-10-30
Supplement: pgen.1009085.s001.pdf [file pgen.1009085.s001.pdf]

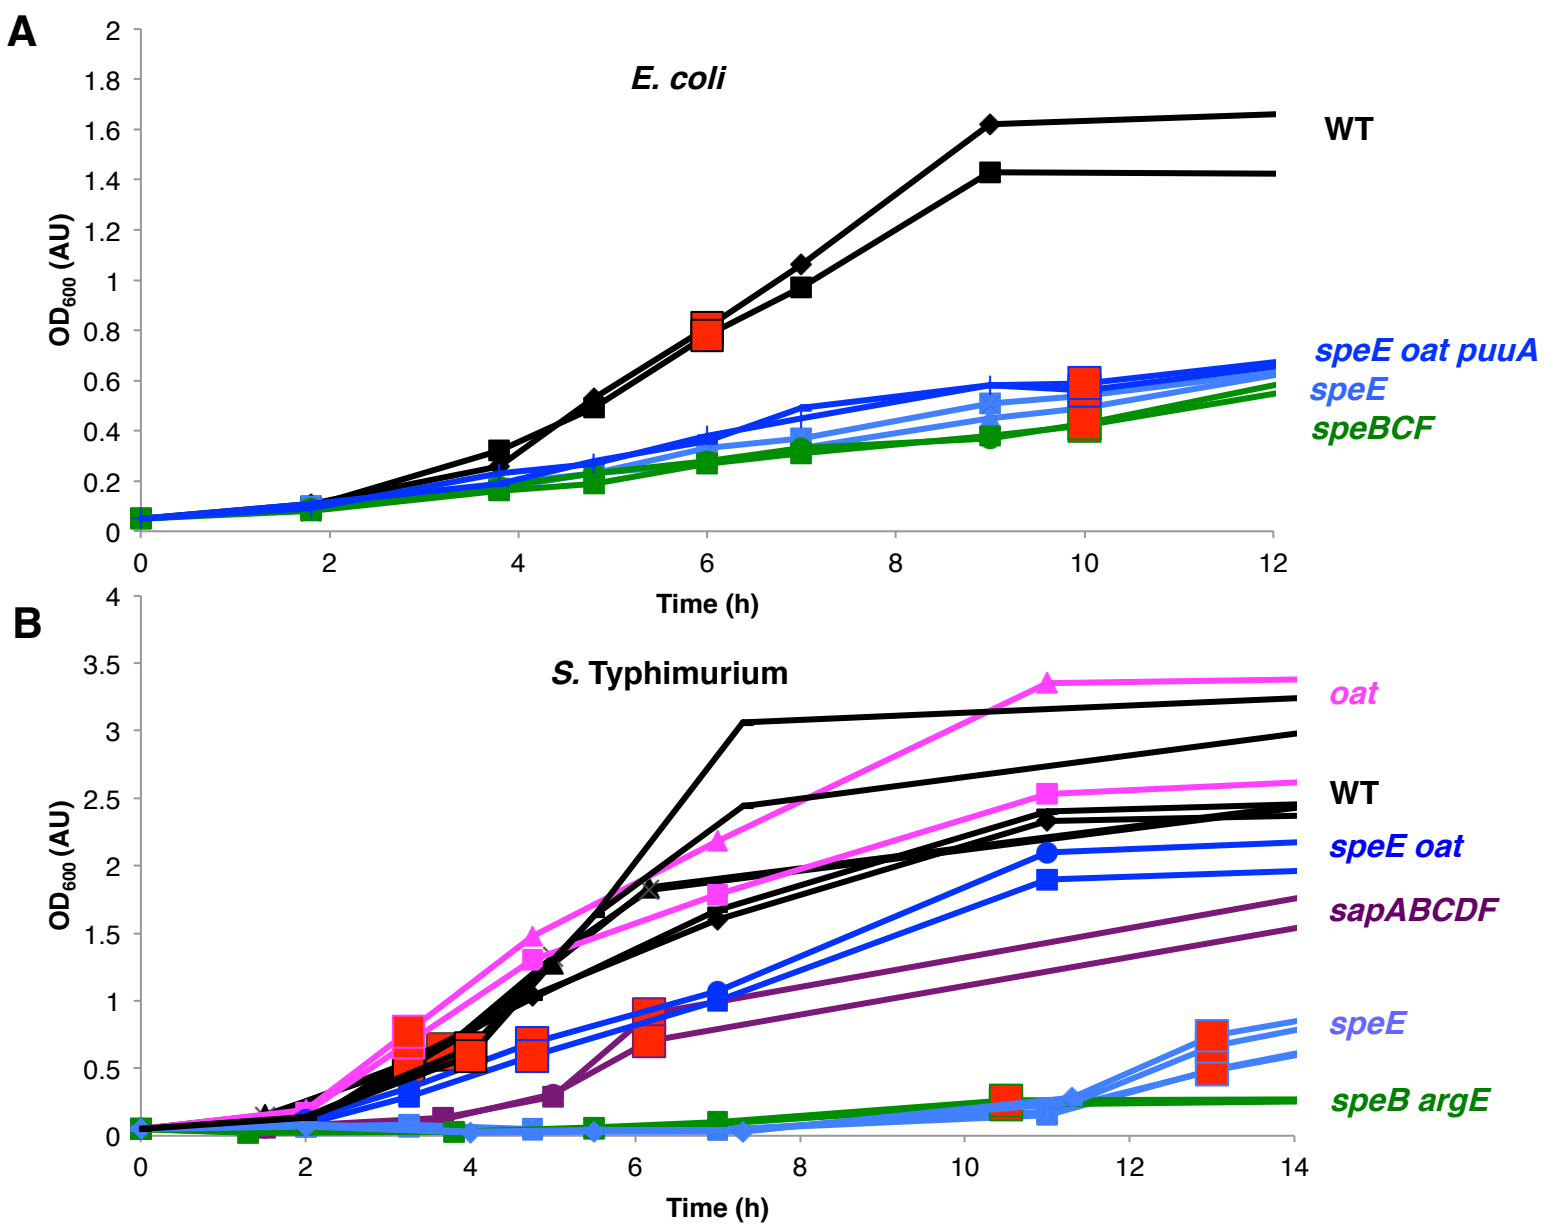

**Figure S1: Growth curves for the various strains presented in Figure 2.**

A: *E. coli* strains

B: *S. Typhimurium* strains.

Each line represents a single biological replicate. The large red square represents the point where samples were taken for DNA supercoiling
