# Supplementary material for: DNA supercoiling differences in bacteria result from disparate DNA gyrase activation by polyamines
Source: PubMed Central journal article supplement (PMC7598504; doi:10.1371/journal.pgen.1009085), 2020-10-30
Supplement: pgen.1009085.s003.pdf [file pgen.1009085.s003.pdf]

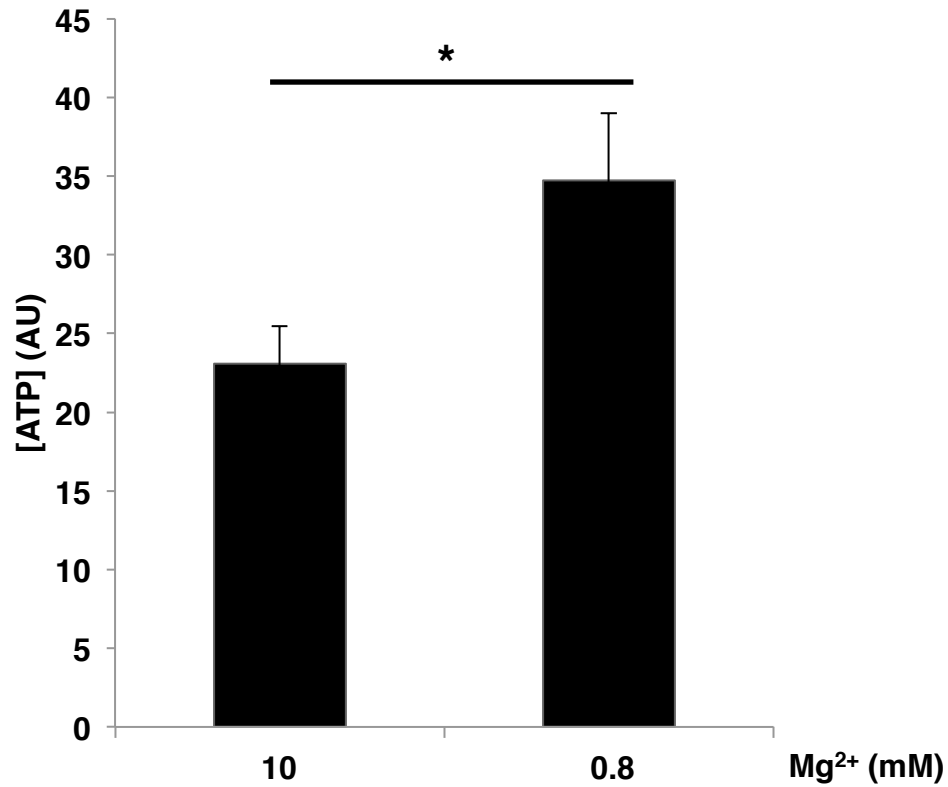

**Figure S3: ATP amounts vary little in response to excess Mg<sup>2+</sup>**

Intracellular ATP concentrations of wild-type *S. Typhimurium* (14028s) were measured using the Bac-Titer Glo assay. \*: p<0.05 (Student's t-test, n=3)
