# Supplementary material for: DNA supercoiling differences in bacteria result from disparate DNA gyrase activation by polyamines
Source: PubMed Central journal article supplement (PMC7598504; doi:10.1371/journal.pgen.1009085), 2020-10-30
Supplement: pgen.1009085.s004.pdf [file pgen.1009085.s004.pdf]

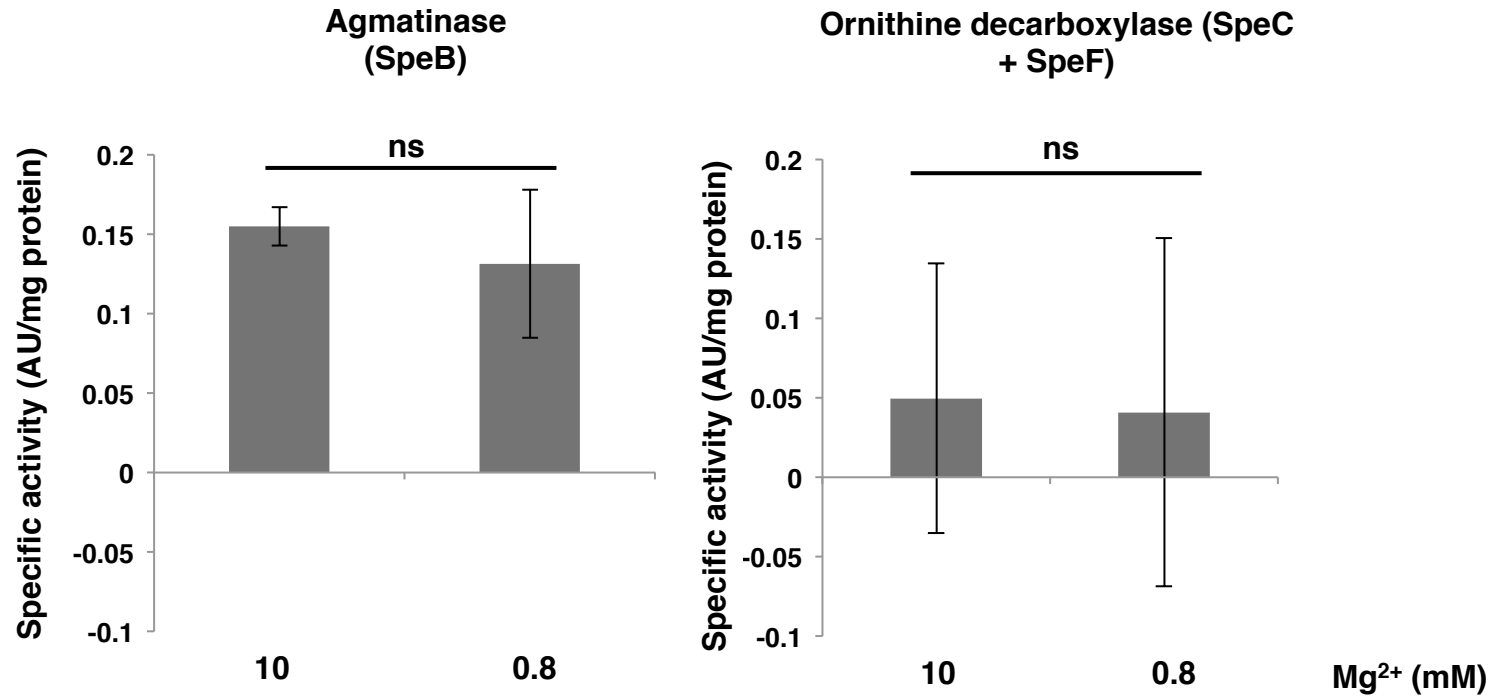

**Figure S4: Activity of putrescine biosynthetic enzymes in crude *S. Typhimurium* extracts**

Agmatinase and ornithine decarboxylase activities were assayed in crude extracts from wild-type *S. Typhimurium* (14028s). ns: not significant (Student's t-test, n=3)
