# Supplementary material for: DNA supercoiling differences in bacteria result from disparate DNA gyrase activation by polyamines
Source: PubMed Central journal article supplement (PMC7598504; doi:10.1371/journal.pgen.1009085), 2020-10-30
Supplement: pgen.1009085.s005.pdf [file pgen.1009085.s005.pdf]

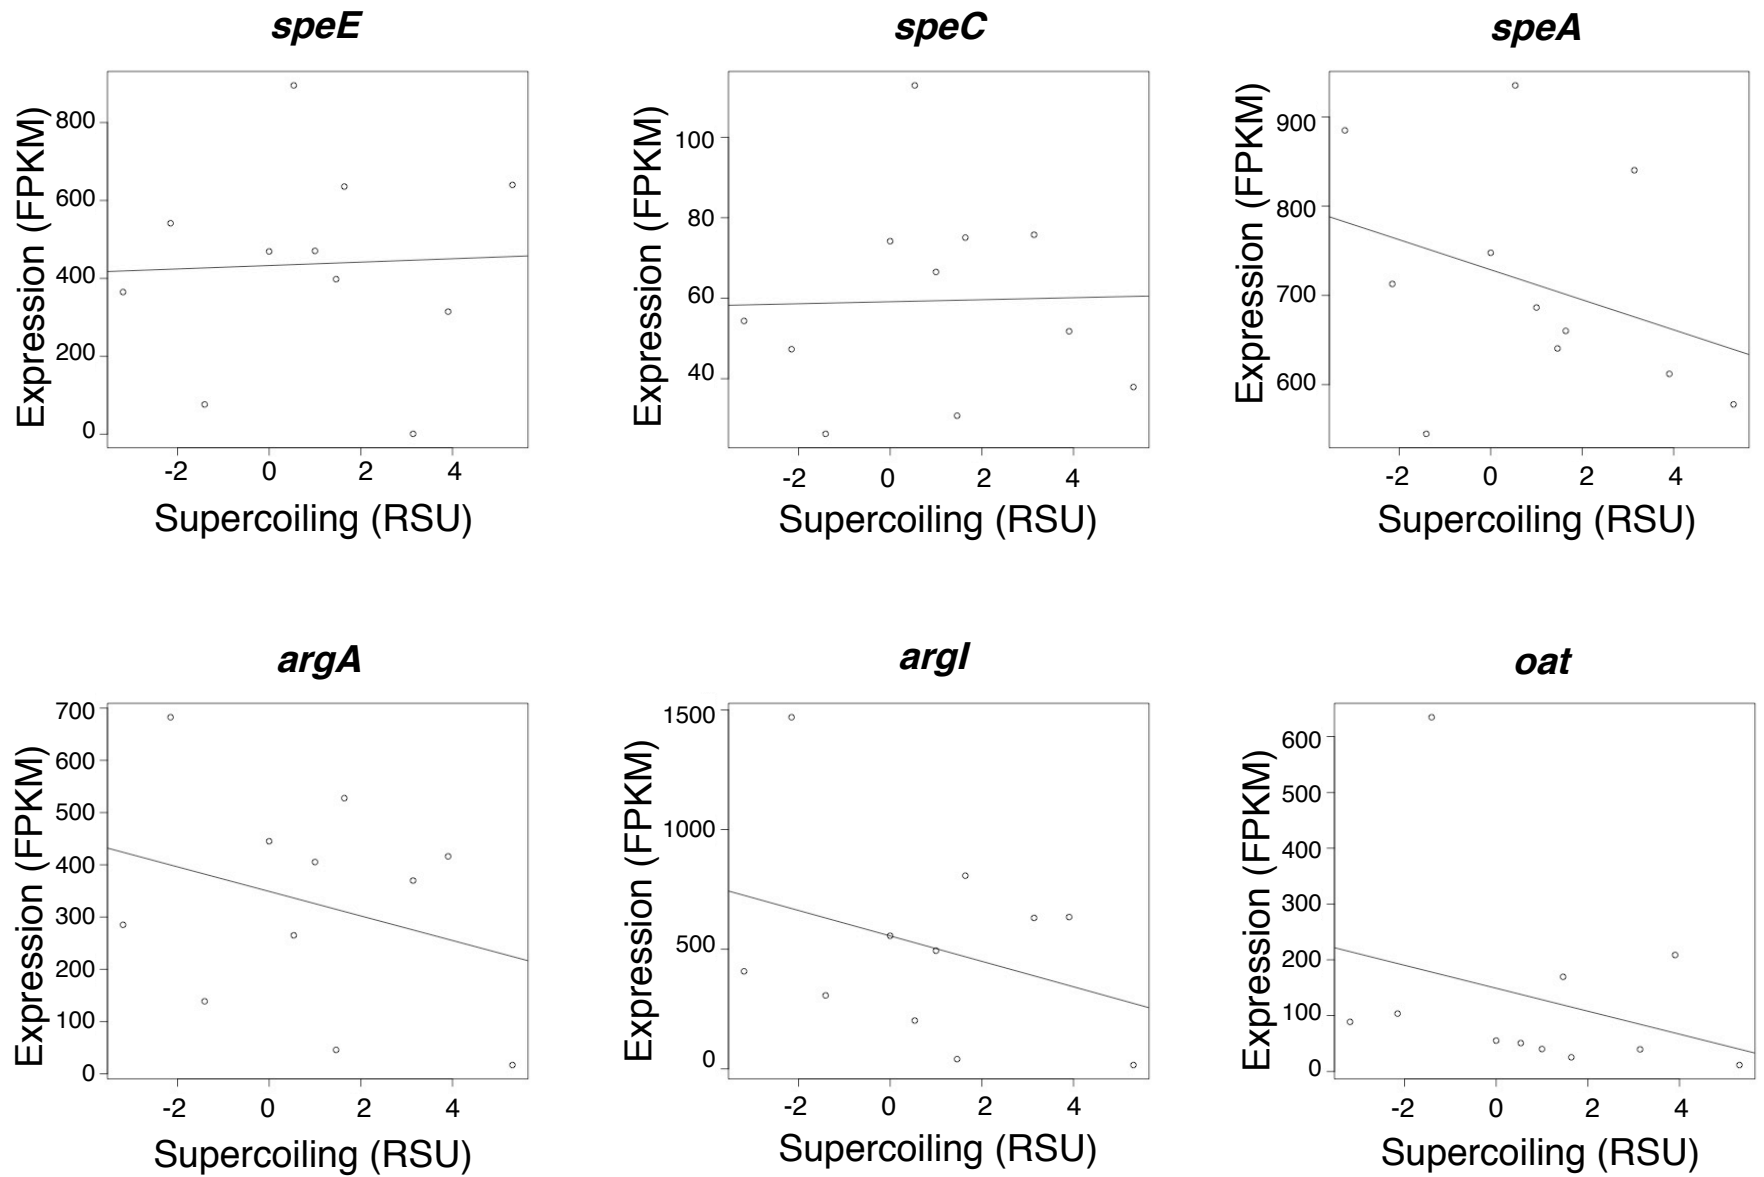

**Figure S5: Expression of key putrescine-related genes is not dependent on DNA supercoiling.**

Expression of the presented *S. Typhimurium* genes (in FPKM) was plotted as a function of DNA supercoiling (data taken from GEO entry GSE137586). Open circles represent independent data points, and lines represent linear regressions.
