# Supplementary material for: DNA supercoiling differences in bacteria result from disparate DNA gyrase activation by polyamines
Source: PubMed Central journal article supplement (PMC7598504; doi:10.1371/journal.pgen.1009085), 2020-10-30
Supplement: pgen.1009085.s006.pdf [file pgen.1009085.s006.pdf]

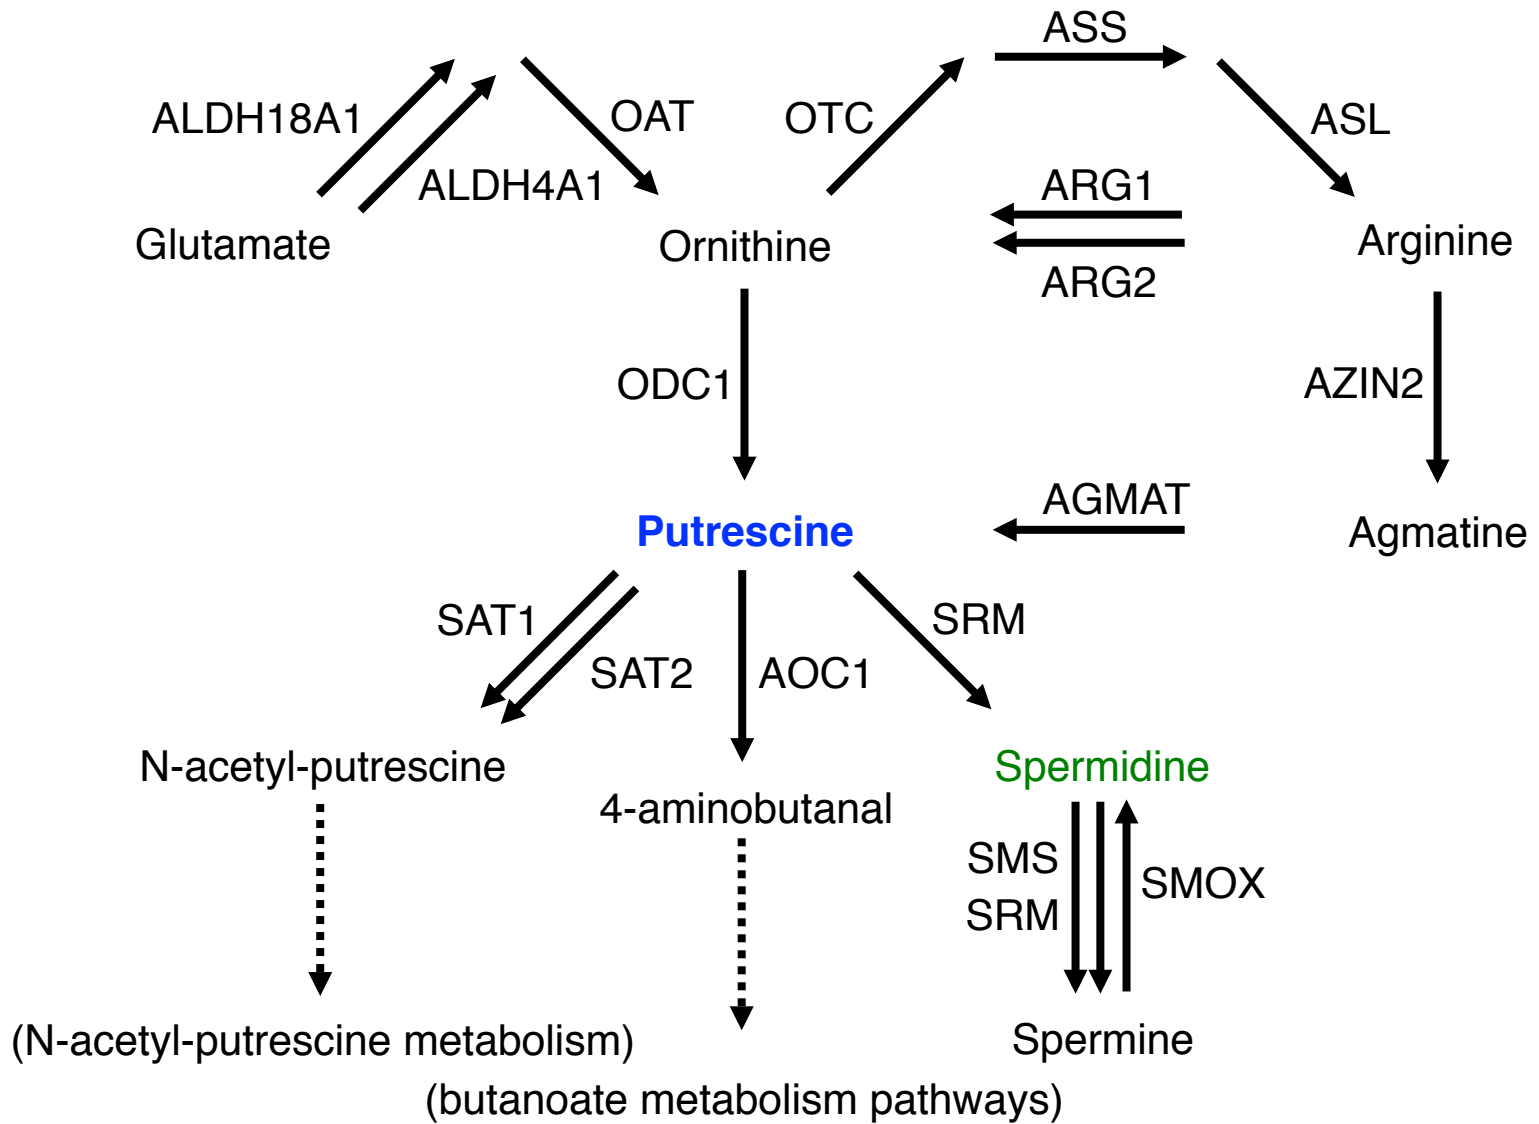

**Figure S6: The putrescine biosynthetic and degradative pathways in *H. sapiens***  
 Note that OAT is unrelated to the bacterial Oat and catalyzes a different reaction.
