# Supplementary material for: DNA supercoiling differences in bacteria result from disparate DNA gyrase activation by polyamines
Source: PubMed Central journal article supplement (PMC7598504; doi:10.1371/journal.pgen.1009085), 2020-10-30
Supplement: pgen.1009085.s007.pdf [file pgen.1009085.s007.pdf]

**Table S1: Strains, plasmids and primers used in this study**

| Strains            | Description                                           | Ref                             |
|--------------------|-------------------------------------------------------|---------------------------------|
| <i>S. enterica</i> |                                                       |                                 |
| 14028s             | Wild-type <i>S. enterica</i> serovar Typhimurium      | [1]                             |
| AAD46              | 14028s <i>speE::cat</i>                               | This work                       |
| JY979              | 14028s $\Delta oat$                                   | J. Yeom, personal communication |
| AAD58              | 14028s <i>speE::cat</i> $\Delta oat$                  | This work                       |
| EG6501             | 14028s <i>sapABCDF::kan</i>                           | [2]                             |
| AAD61              | 14028s <i>argE::kan</i>                               | This work                       |
| AAD62              | 14028s <i>speB::cat</i>                               | This work                       |
| AAD65              | 14028s $\Delta speB$                                  | This work                       |
| AAD181             | 14028s <i>speE::cat</i> $\Delta oat$ <i>argA::kan</i> | This work                       |
| AAD212             | 14028s $\Delta speB$ <i>argE::kan</i>                 | This work                       |
| <i>E. coli</i>     |                                                       |                                 |
| MG1655             | Wild-type <i>E. coli</i> K12, F- $\lambda$ -          |                                 |
| AAD85              | MG1655 <i>speE::kan</i>                               | This work                       |

|       |                                                 |           |
|-------|-------------------------------------------------|-----------|
| AAD86 | MG1655 <i>oat::cat</i>                          | This work |
| AAD87 | MG1655 <i>speC::kan</i>                         | This work |
| AAD88 | MG1655 $\Delta$ <i>oat</i>                      | This work |
| AAD89 | MG1655 <i>speB::cat</i>                         | This work |
| AAD90 | MG1655 <i>speF::cat</i>                         | This work |
| AAD91 | MG1655 <i>puuA::cat</i>                         | This work |
| AAD92 | MG1655 $\Delta$ <i>speB</i>                     | This work |
| AAD95 | MG1655 $\Delta$ <i>speB speC::kan speF::cat</i> | This work |
| AAD96 | MG1655 $\Delta$ <i>oat speE::kan puuA::cat</i>  | This work |

---

| Plasmids | Description                                                       | Ref |
|----------|-------------------------------------------------------------------|-----|
| pJV      | Standard vector for DNA supercoiling measurements                 | [3] |
| pKD3     | Template vector for $\lambda$ red recombination, Cm <sup>R</sup>  | [4] |
| pKD4     | Template vector for $\lambda$ red recombination, Kan <sup>R</sup> | [4] |
| pSIM6    | $\lambda$ red plasmid, heat-inducible                             | [5] |
| pCP20    | FLP recombinase plasmid, heat-inducible                           | [4] |

---

| Primers | Sequence | Target | Ref |
|---------|----------|--------|-----|
|---------|----------|--------|-----|

---

|       |                            |                       |
|-------|----------------------------|-----------------------|
|       | ATTATGTTGCGCCCTTTTTTTACGG  |                       |
| 16651 | GTGTTAACAAGGAGGTATCAACC    | This work             |
|       | CGTGTAGGCTGGAGCTGCTTC      |                       |
|       |                            | <i>speE,</i>          |
|       | AGATTATTAAAGCCATGCAGTTTC   | <i>S. Typhimurium</i> |
| 16652 | AGTTTTTTCAATTTCTTATCTTCTCC | This work             |
|       | CATATGAATATCCTCCTTAG       |                       |
|       | ATAATTAATGCATGAATATTGATA   |                       |
| 16698 | CTATCATGACCTGAGGTGTGTCAA   | This work             |
|       | CAGTGTAGGCTGGAGCTGCTTC     | <i>argE,</i>          |
|       | CTACAAGACGGGGTAGGCCCGGTA   | <i>S. Typhimurium</i> |
| 16699 | AACATCACGTCACCGGGCAATATG   | This work             |
|       | CACATATGAATATCCTCCTTAG     |                       |
|       | CTAACGACGCGGGAGGGTTTTTTTA  |                       |
| 16702 | TATTGACTAAGAAGAGGTTTTTGCC  | This work             |
|       | GTGTAGGCTGGAGCTGCTTC       | <i>speB,</i>          |
|       | CATCAATCAGCTGTAGGCCGGATA   | <i>S. Typhimurium</i> |
| 16703 | AGCGCAGCGCCATCCGGCAAAC     | This work             |
|       | AACCATATGAATATCCTCCTTAG    |                       |
|       | AACGACGCGGAAGGGTTTTTTTAT   |                       |
| 16832 | ATCGACTTTGTAATAGGAGTCCATC  | <i>speB, E. coli</i>  |
|       | CGTGTAGGCTGGAGCTGCTTC      | This work             |

|       |                                                       |                                  |
|-------|-------------------------------------------------------|----------------------------------|
|       | CGCATCCGACATTAATGGCACGTTT                             |                                  |
| 16833 | TACCCGTGCGCATCGCATCTGGTGC<br>CATATGAATATCCTCCTTAG     | This work                        |
|       | ATTATGTTGCGCCCTTTTTTTACGG                             |                                  |
| 16834 | GTGTTAACAAAGGAGGTATCAACC<br>CGTGTAGGCTGGAGCTGCTTC     | This work                        |
|       | AGATTATTAAGCCATGCAGTTTC                               | <i>speE, E. coli</i>             |
| 16835 | AGTTTTTTCAATTTCTTATCTTCTCC<br>CATATGAATATCCTCCTTAG    | This work                        |
|       | TCATTCGAGAAATTGAGGACCTGC                              |                                  |
| 16836 | TATTACCTAAAATAAAGAGATGAA<br>AAGTGTAGGCTGGAGCTGCTTC    | This work                        |
|       | CGTCAGTATGGTTAACTGAACGAC                              | <i>speF, E. coli</i>             |
| 16837 | GCCCATTTTGTTCGATTTAGCCTGA<br>CCATATGAATATCCTCCTTAG    | This work                        |
|       | GTTTTCCACCTTGTCGGTATTCTTA                             |                                  |
| 16838 | CTTCCCCGAAACGGGTTTGCGCTTG<br>TGTAGGCTGGAGCTGCTTC      | This work                        |
|       | GGTCGCCAGAAGGTGACCCGTTTTT                             | <i>speC, E. coli</i>             |
| 16839 | TTTATTCTtaCTTCAACACATAACCC<br>ATATGAATATCCTCCTTAG     | This work                        |
| 16840 | TGCAATACTTAAATCGGTATCATGT<br>GATACGCGAGCCTCCGGAGCATAT | <i>oat, E. coli</i><br>This work |

TGTGTAGGCTGGAGCTGCTTC

GTCGTATAAAAAGATCCGGATGGCG

16841

ACGTCGTATCGCCATCCGATTTGAT

This work

ACATATGAATATCCTCCTTAG

ATATTTTACGCTTTGATAACGAGCG

16842

GAAAACAAACCAAAGGCGAAGAA

This work

TCGTGTAGGCTGGAGCTGCTTC

ATGTCAGGCCTGGCTCCGCTCAGG

*puuA, E. coli*

16843

CCGATGAAACAACCCCGCAAGGG

This work

GTACATATGAATATCCTCCTTAG

## References

1. Fields PI, Groisman EA, Heffron F. A Salmonella locus that controls resistance to microbicidal proteins from phagocytic cells. *Science*. 1989;243: 1059–1062. doi:10.1126/science.2646710
2. Parra-Lopez C, Baer MT, Groisman EA. Molecular genetic analysis of a locus required for resistance to antimicrobial peptides in *Salmonella typhimurium*. *EMBO J*. 1993;12: 4053–4062.
3. Duprey A, Muskhelishvili G, Reverchon S, Nasser W. Temporal control of *Dickeya dadantii* main virulence gene expression by growth phase-dependent alteration of regulatory nucleoprotein complexes. *Biochim Biophys Acta*. 2016;1859: 1470–1480. doi:10.1016/j.bbagr.2016.08.001
4. Datsenko KA, Wanner BL. One-step inactivation of chromosomal genes in *Escherichia coli* K-12 using PCR products. *Proc Natl Acad Sci*. 2000;97: 6640–6645. doi:10.1073/pnas.120163297
5. Datta S, Costantino N, Court DL. A set of recombineering plasmids for gram-negative bacteria. *Gene*. 2006;379: 109–115. doi:10.1016/j.gene.2006.04.018
